# Supplementary material
Source: HighWire-hosted journal article supplement (https://www.cmajopen.ca/highwire/filestream/89368/field_highwire_adjunct_files/9/open-2021-0320-9-at.pdf)
Supplement: open-2021-0320-9-at.pdf [file open-2021-0320-9-at.pdf]

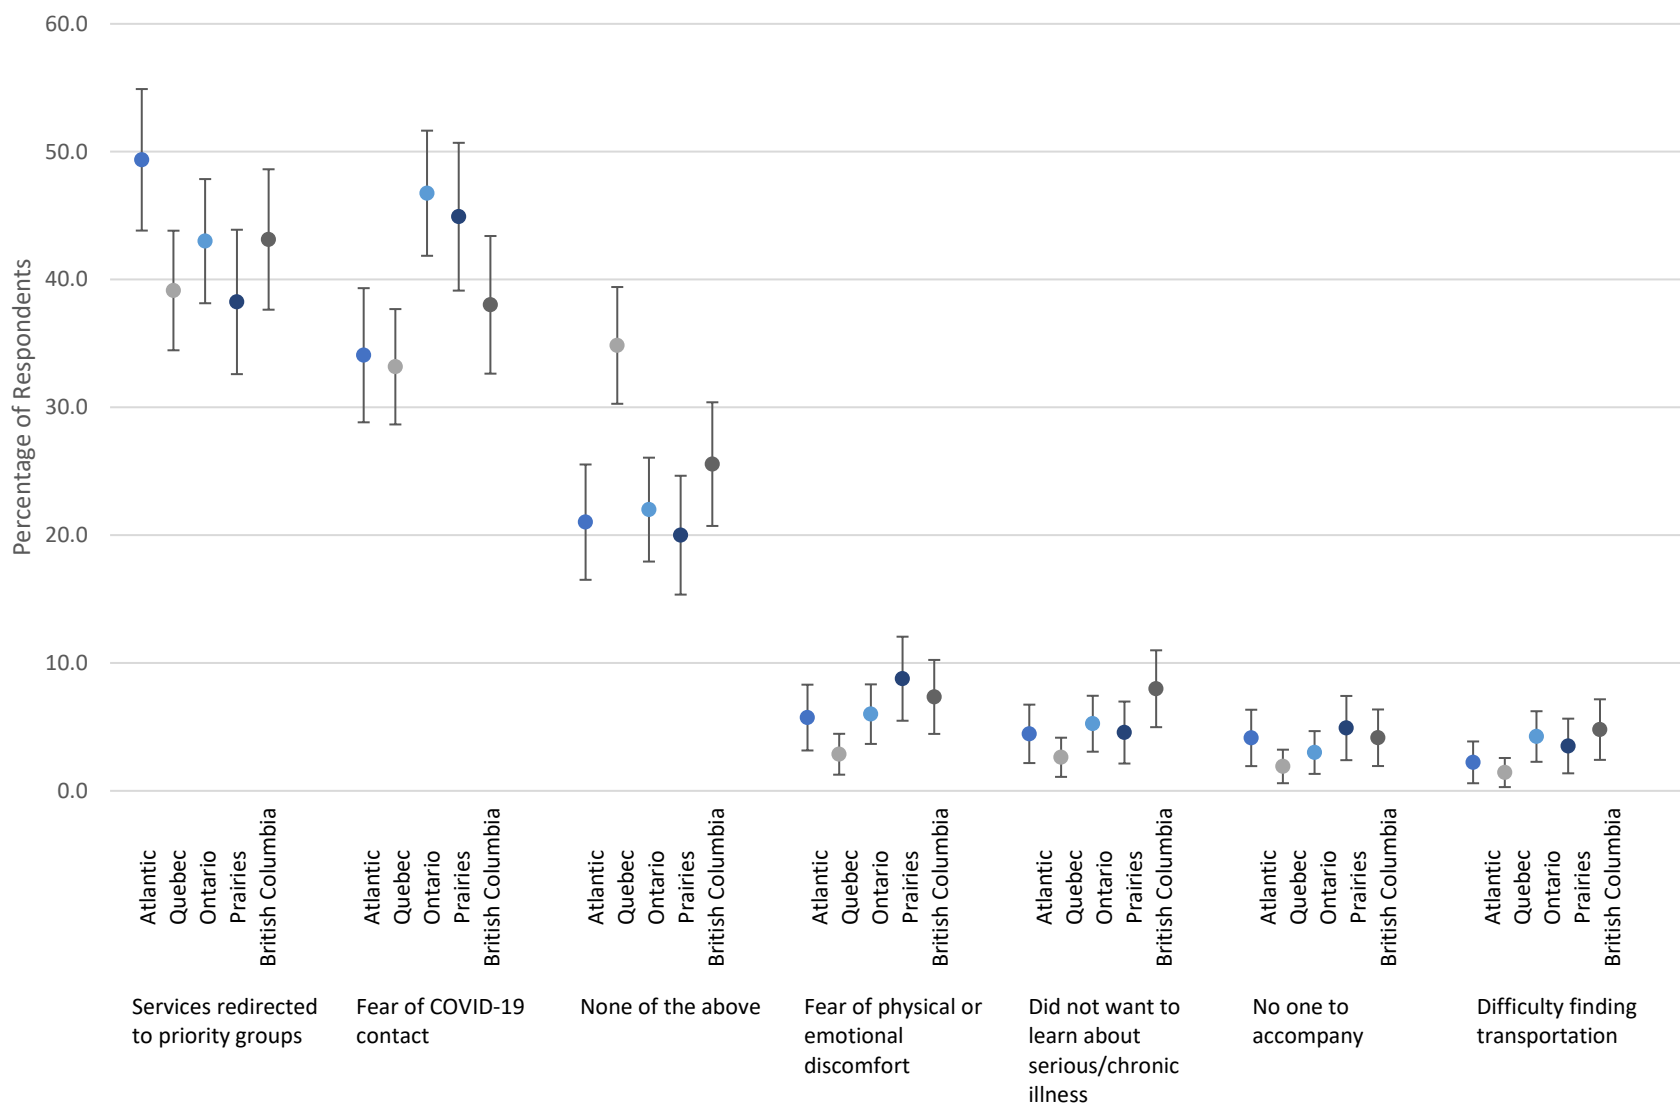

Supplementary Figure 3: Reasons for not visiting the hospital or seeing a doctor while needing to as reported by participants in the CLSA COVID-19 exit survey (Sept. to Dec. 2020), stratified by province (N=1731)

Appendix 9, as supplied by the authors. Appendix to: Khattar J, Anderson LN, De Rubeis V, et al. Unmet health care needs during the COVID-19 pandemic among adults: a prospective cohort study in the Canadian Longitudinal Study on Aging. *CMAJ Open* 2023. doi:10.9778/cmajo.2021-0320. Copyright © 2023 The Author(s) or their employer(s). To receive this resource in an accessible format, please contact us at [cmajgroup@cmaj.ca](mailto:cmajgroup@cmaj.ca).
